# Supplementary material for: Population Pharmacokinetics and Pharmacodynamics of Chloroquine in a Plasmodium vivax Volunteer Infection Study
Source: PubMed Central journal article supplement (PMC7276750; doi:10.1002/cpt.1893), 2020-07-02

**Figure S1** Plots of chloroquine and desethylchloroquine concentrations in plasma, whole blood and erythrocytes over time, and correlations between chloroquine and desethylchloroquine whole blood and erythrocyte concentrations.

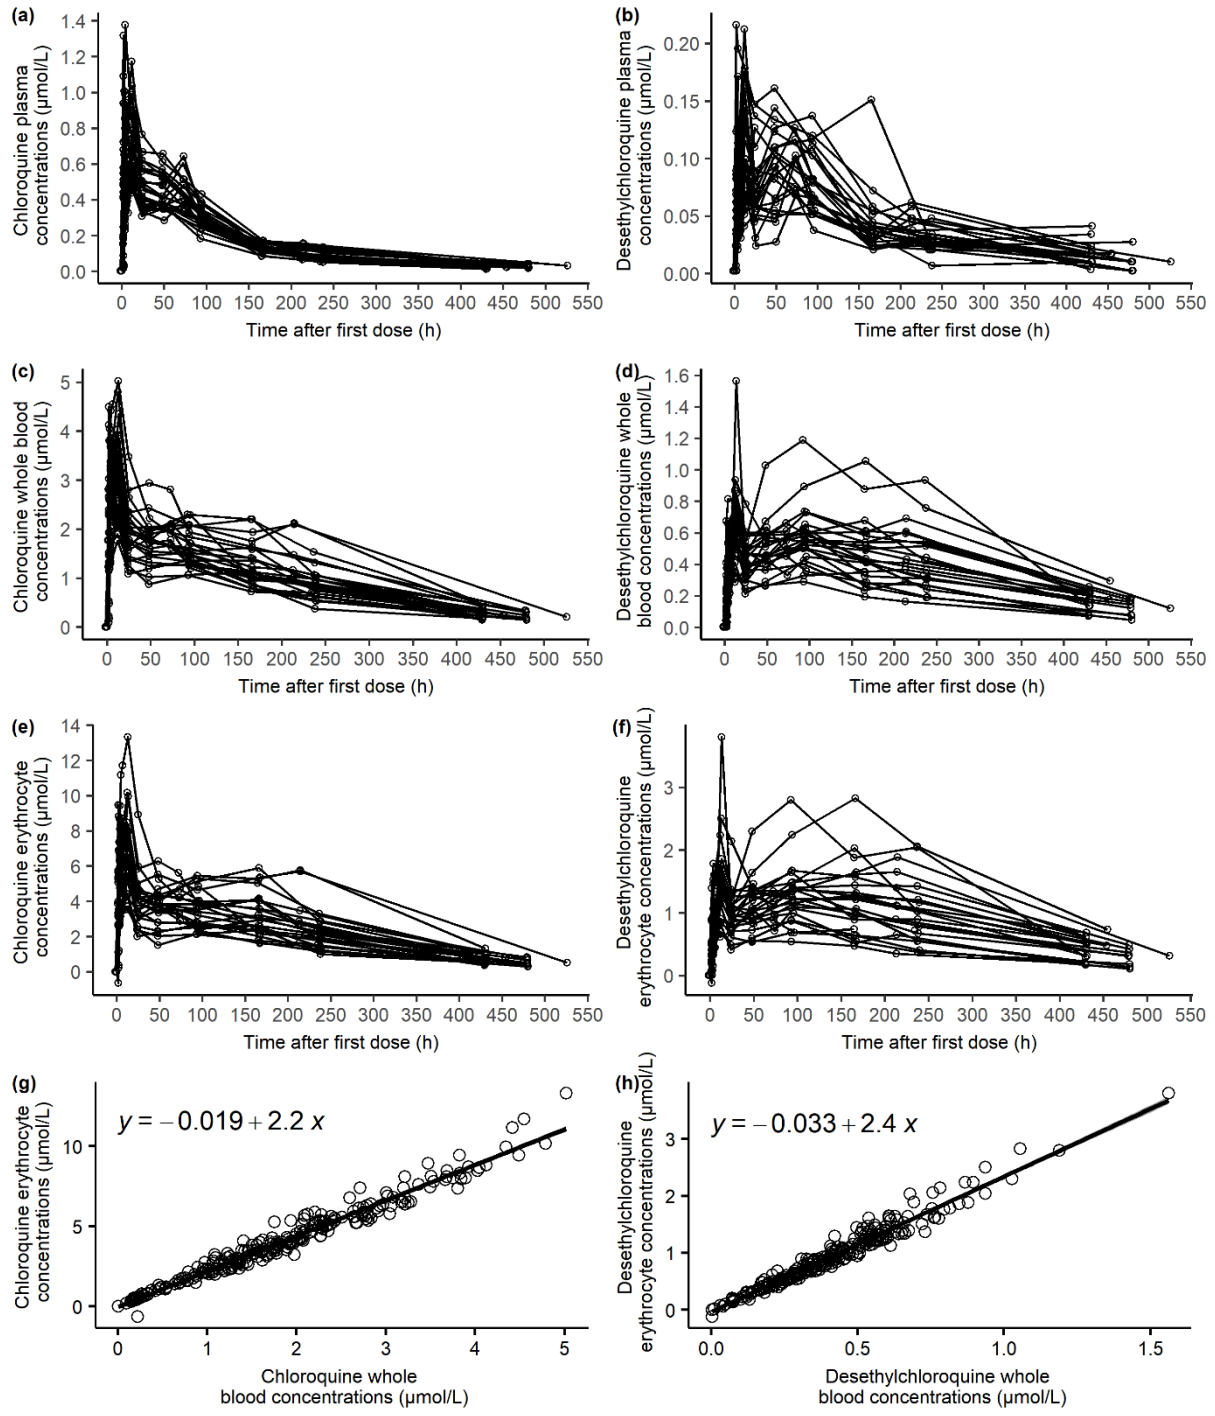

Supplement: CPT-108-1055-s007.pdf [file CPT-108-1055-s007.pdf]
